# Supplementary material
Source: Springer Nature journal article supplement (https://www.springermedizin.de/resource/supplementary/12947_2008_238_MOESM2_ESM.pdf/9556524)

3/P.9

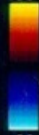

.69

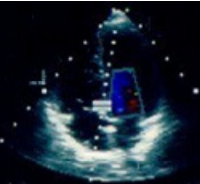

H3.5 MHz 160mm  
aCARDIAC-DIFF  
GENERAL

2:0 100%

CAL = .10m/s

2.0MHz

.20

m/s

.20

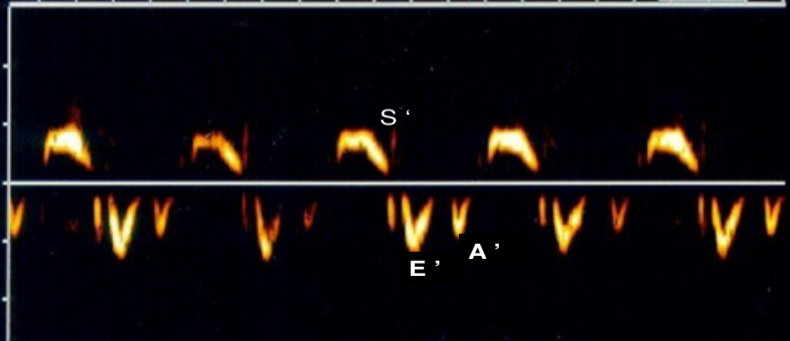

S'

E'

A'

Supplement: MOESM2 [file 9556524]
